# Supplementary material for: Shifts in soil nutrient concentrations and C:N:P stoichiometry during long-term natural vegetation restoration
Source: PeerJ. 2020 Jan 22;8:e8382. doi: 10.7717/peerj.8382 (PMC6982410; doi:10.7717/peerj.8382)
Supplement: Data S1 [file peerj-08-8382-s001.xlsx]

## Sheet: Sheet1
Vegetation type	Soil layer (cm)	TOC(g kg-1)	TN(g kg-1)	TP(g kg-1)
Ql-1	0-10	39.6546	3.82252	0.698601
Ql-2	0-10	34.4	3.77042	0.802973
Ql-3	0-10	40.1986	3.1233	0.715889
Ql-1	10-20	16.9347	1.55545	0.662093
Ql-2	10-20	15.6525	1.40484	0.681903
Ql-3	10-20	11.4144	1.05537	0.661254
Ql-1	20-40	9.14363	0.873154	0.67738
Ql-2	20-40	6.99244	0.826659	0.631771
Ql-3	20-40	6.88905	0.778893	0.623178
Ql-1	40-70	5.23222	0.57214	0.667353
Ql-2	40-70	3.75204	0.411252	0.62438
Ql-3	40-70	3.97335	0.419268	0.620265
Ql-1	70-100	2.96999	0.272415	0.582048
Ql-2	70-100	2.82547	0.275865	0.621858
Ql-3	70-100	3.75174	0.346879	0.620977
Pd-1	0-10	35.8272	3.02706	0.670311
Pd-2	0-10	33.6419	3.46101	0.683456
Pd-3	0-10	31.3737	2.90873	0.725114
Pd-1	10-20	12.2471	1.17208	0.650744
Pd-2	10-20	13.9709	1.24134	0.631026
Pd-3	10-20	12.9609	1.17548	0.604282
Pd-1	20-40	7.6876	0.682977	0.585741
Pd-2	20-40	7.56859	0.661904	0.603946
Pd-3	20-40	6.41579	0.629677	0.56302
Pd-1	40-70	4.63157	0.402813	0.535897
Pd-2	40-70	4.34908	0.403179	0.591197
Pd-3	40-70	2.66538	0.339569	0.56792
Pd-1	70-100	2.62691	0.323521	0.540843
Pd-2	70-100	3.22629	0.37965	0.59639
Pd-3	70-100	2.5706	0.290138	0.566509
Bp-1	0-10	26.8628	2.55105	0.732535
Bp-2	0-10	24.633	2.07031	0.73146
Bp-3	0-10	30.3483	3.31575	0.802593
Bp-1	10-20	10.1338	0.971612	0.752062
Bp-2	10-20	12.0016	1.17135	0.755353
Bp-3	10-20	11.2803	1.01627	0.74764
Bp-1	20-40	4.48503	0.538365	0.68989
Bp-2	20-40	4.82918	0.559266	0.669322
Bp-3	20-40	6.38038	0.674444	0.708711
Bp-1	40-70	3.76099	0.43865	0.687775
Bp-2	40-70	3.33511	0.362472	0.636242
Bp-3	40-70	3.61712	0.412286	0.667507
Bp-1	70-100	3.70256	0.459551	0.719034
Bp-2	70-100	3.01578	0.37758	0.693527
Bp-3	70-100	3.41924	0.380063	0.721776
Hr-1	0-10	24.0795	2.51152	0.70837
Hr-2	0-10	23.3845	2.16173	0.636651
Hr-3	0-10	28.1016	2.50408	0.597618
Hr-1	10-20	12.7269	1.16399	0.567942
Hr-2	10-20	12.4847	1.21102	0.603505
Hr-3	10-20	9.18095	0.852695	0.529146
Hr-1	20-40	6.413	0.801697	0.54286
Hr-2	20-40	6.92716	0.746136	0.512738
Hr-3	20-40	6.43465	0.585192	0.527674
Hr-1	40-70	6.40959	0.706109	0.57977
Hr-2	40-70	4.3642	0.499798	0.562514
Hr-3	40-70	5.12675	0.621226	0.544267
Hr-1	70-100	5.47597	0.626567	0.546947
Hr-2	70-100	3.34397	0.36179	0.529365
Hr-3	70-100	3.78678	0.45085	0.546142
Bi-1	0-10	18.249	1.44518	0.65621
Bi-2	0-10	21.4248	1.60989	0.642955
Bi-3	0-10	19.7657	1.76093	0.682385
Bi-1	10-20	10.3425	0.962931	0.604447
Bi-2	10-20	10.4468	1.22713	0.634849
Bi-3	10-20	9.14484	0.967527	0.635002
Bi-1	20-40	4.23049	0.366514	0.598751
Bi-2	20-40	4.24178	0.381624	0.573597
Bi-3	20-40	4.50667	0.377602	0.581359
Bi-1	40-70	2.92268	0.364223	0.571055
Bi-2	40-70	3.36867	0.249974	0.542281
Bi-3	40-70	3.07708	0.260629	0.584518
Bi-1	70-100	2.76741	0.276174	0.630447
Bi-2	70-100	2.8521	0.223937	0.512106
Bi-3	70-100	2.5455	0.243722	0.569802
Fa-1	0-10	7.36	1.01	0.75
Fa-2	0-10	7.20254	0.98402	0.785708
Fa-3	0-10	7.28	0.99	0.82
Fa-1	10-20	6.42404	0.983546	0.744531
Fa-2	10-20	6.48	0.93	0.71
Fa-3	10-20	6.53	1.02	0.77
Fa-1	20-40	6.66	0.96	0.69
Fa-2	20-40	6.17	0.97	0.73
Fa-3	20-40	6.35911	0.941698	0.712789
Fa-1	40-70	4.28115	0.691218	0.68613
Fa-2	40-70	4.41	0.65	0.67
Fa-3	40-70	4.15	0.71	0.69
Fa-1	70-100	3.74	0.44	0.7
Fa-2	70-100	3.57284	0.565871	0.661865
Fa-3	70-100	3.36	0.66	0.6
